# Supplementary material for: Fine tuning of phosphorus active sites on g-C3N4 nanosheets for enhanced photocatalytic decontamination
Source: Royal Society of Chemistry journal article supplement (doi:10.1039/d1ta01537k), 2021-01-01
Supplement: d1ta01537k1.pdf [file d1ta01537k1.pdf]

***Supplementary information***

**Finely tuning the phosphorus active site on g-C<sub>3</sub>N<sub>4</sub> nanosheets for enhanced photocatalytic  
decontamination**

Lian-Lian Liu<sup>a,\*</sup>, Fei Chen<sup>a,b,c,\*</sup>, Jing-Hang Wu<sup>a</sup>, Wen-Wei Li<sup>a</sup>, Jie-Jie Chen<sup>a,\*\*</sup>, Han-Qing Yu<sup>a,\*\*</sup>

<sup>a</sup>CAS Key Laboratory of Urban Pollutant Conversion, Department of Environmental Science and  
Engineering, University of Science & Technology of China, Hefei, China

<sup>b</sup>Key Laboratory of the Three Gorges Reservoir Region's Eco-Environment, Ministry of Education,  
Chongqing University, Chongqing, 400045, China

<sup>c</sup>College of Environment and Ecology, Chongqing University, Chongqing, 400045, China

\* These authors contributed equally to this work.

**\*\*Corresponding authors:**

Prof. Jie-Jie Chen, Fax: 86-551-63601592, E-mail: [chenjie@ustc.edu.cn](mailto:chenjie@ustc.edu.cn)

Prof. Han-Qing Yu, Fax: 86-551-63607592, E-mail: [hqyu@ustc.edu.cn](mailto:hqyu@ustc.edu.cn)

## **Experimental method section**

### **Photoelectrochemical characterizations**

The CHI660E electrochemical workstation equipped with a standard three-electrode system was used to characterize the photoelectrochemical characteristics of the prepared photocatalysts. The reference electrode is a saturated Ag/AgCl electrode, the counter electrode is a platinum wire, and the working electrode is an F-doped SnO<sub>2</sub> (FTO) conductive glass covered with the photocatalyst. The working electrode was prepared as follows: first, 5 mg sample was dispersed into a mixed solution containing ethanol (0.3 mL) and isopropanol (0.1 mL) under the ultrasonication treatment for 30 min. Then the stored Nafion solution (20  $\mu$ L) was added into the suspension and sonicated for another 30 min. Finally, the formed ink (0.2 mL) was coated onto a 1 cm $\times$ 4 cm FTO with an effective working area of 2 cm<sup>2</sup> and dried at 200  $^{\circ}$ C for 2 h. A 300 W Xe lamp (PLS/SXE 300D/300DUV, Beijing Perfectlight Technology Co., Ltd.) with a 400 nm cutoff filter was used as the light source. The transient photocurrent response curve was measured under a bias voltage of 0 V and 0.25 M Na<sub>2</sub>SO<sub>4</sub> aqueous solution was used as the electrolyte. Electrochemical impedance spectroscopy (EIS) was obtained by applying an AC voltage of 5 mV amplitude in the frequency range from 10<sup>5</sup> to 1 Hz and the aqueous solution (containing 5 mM [Fe(CN)<sub>6</sub>]<sup>3-/4-</sup> and 0.1 M KCl) served as the electrolyte. Mott-Schottky plots were carried out at a frequency of 1 kHz and the applied voltage range of -1.5-0 V.

### **Active species trapping and ESR measurements**

Before light reaction, various scavengers were dosed into BPA solution to investigate the reactive

species involved in the photocatalytic reaction. Benzoquinone (BQ), sodium thiosulfate ( $\text{Na}_2\text{S}_2\text{O}_3$ ), isopropanol (IPA), and sodium oxalate ( $\text{Na}_2\text{C}_2\text{O}_4$ ) were respectively selected as the scavengers of superoxide radical ( $\cdot\text{O}_2^-$ ), electron ( $\text{e}^-$ ), hydroxyl radical ( $\cdot\text{OH}$ ) and holes ( $\text{h}^+$ ). To investigate the source of  $\text{O}_2$ , the catalytic reaction under  $\text{N}_2$  saturated conditions were conducted. Additionally, the formation of  $\cdot\text{O}_2^-$  and  $\cdot\text{OH}$  radicals was further validated by electron spin resonance (ESR) spin-trapping spectra with reagent 5, 5-dimethyl-1-pyrroline N-oxide (DMPO) as the trapping agent (ER200-SRC, Bruker Co., USA). The as-prepared photocatalyst of 5 mg was first dissolved into 0.5 mL of methanol for the DMPO- $\cdot\text{O}_2^-$  or 0.5 mL of deionized water for the DMPO- $\cdot\text{OH}$ , then 10  $\mu\text{L}$  DMPO was dosed and the ESR signals were obtained under the conditions of both dark and visible light irradiation.

**Table S1.** BET surface area of the prepared photocatalysts.

| Photocatalyst  | BET Surface Area<br>(m <sup>2</sup> /g) | Pore Volume<br>(cm <sup>3</sup> /g) | Pore Size<br>(nm) |
|----------------|-----------------------------------------|-------------------------------------|-------------------|
| bulk gCN       | 9.956                                   | 0.0798                              | 32.1              |
| P-gCN          | 5.596                                   | 0.0521                              | 57.2              |
| gCN nanosheets | 135.1                                   | 0.6273                              | 18.6              |
| gCN-P (post)   | 92.68                                   | 0.5106                              | 22.0              |

**Table S2.** Intermediates for the photocatalytic degradation of BPA by gCN-P (post).

| Product | m/z | Structural formula                                                                    |
|---------|-----|---------------------------------------------------------------------------------------|
| BPA     | 227 | 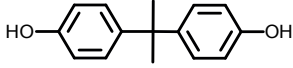   |
| Item A  | 275 | 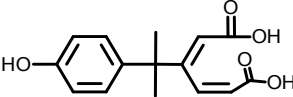   |
| Item B  | 257 | 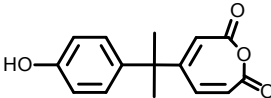   |
| Item C  | 261 | 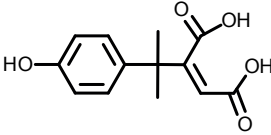   |
| Item D  | 93  | 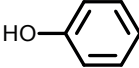  |
| Item E  | 167 | 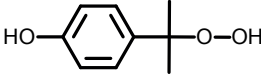 |
| Item F  | 149 | 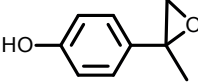 |
| Item G  | 135 | 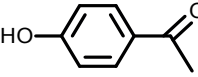 |

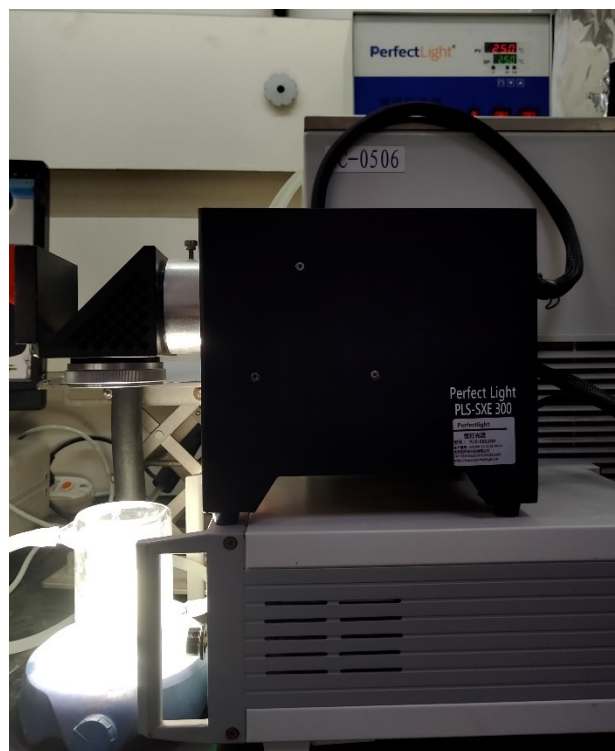

**Fig. S1.** Schematic diagram of the photocatalytic degradation reaction.

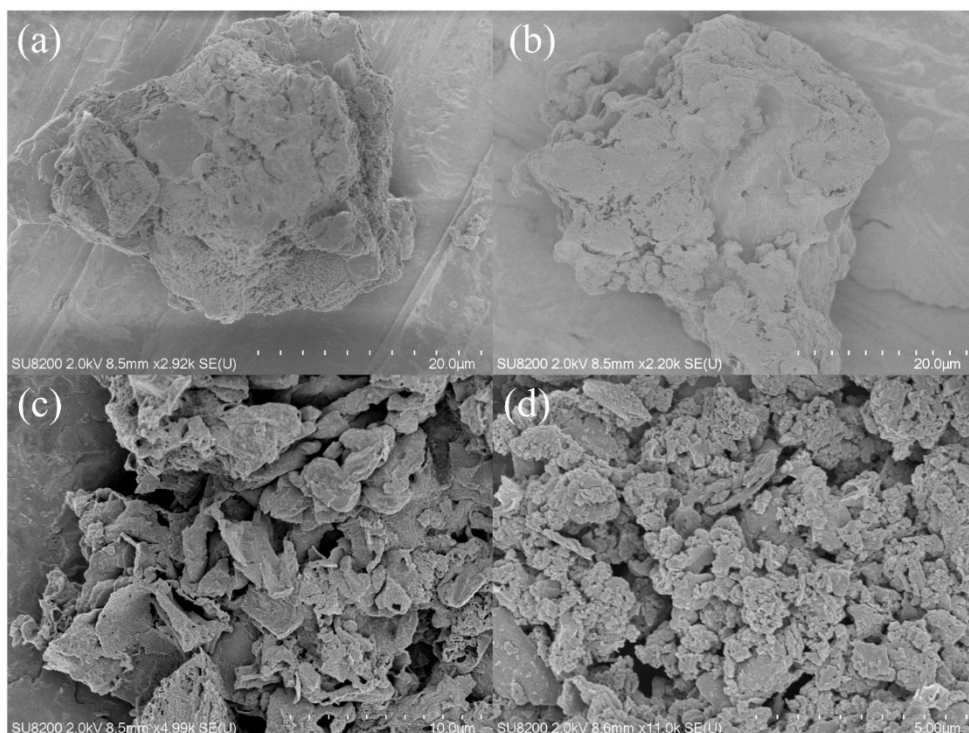

**Fig. S2** SEM images of (a) gCN bulk, (b) P-gCN, (c) gCN sheet, and (d) gCN-P (post)

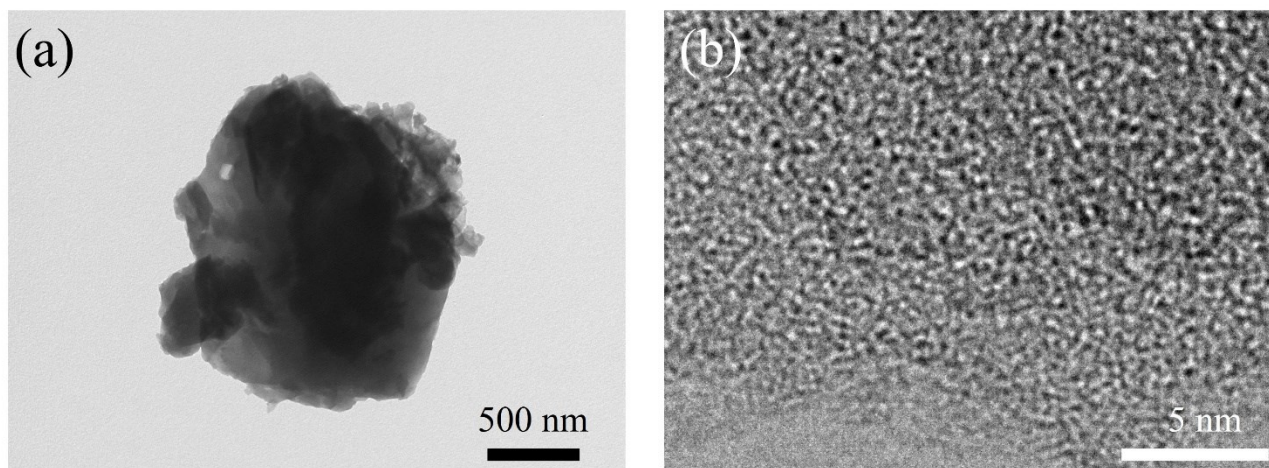

**Fig. S3** (a) TEM and (b) HRTEM images of P-gCN.

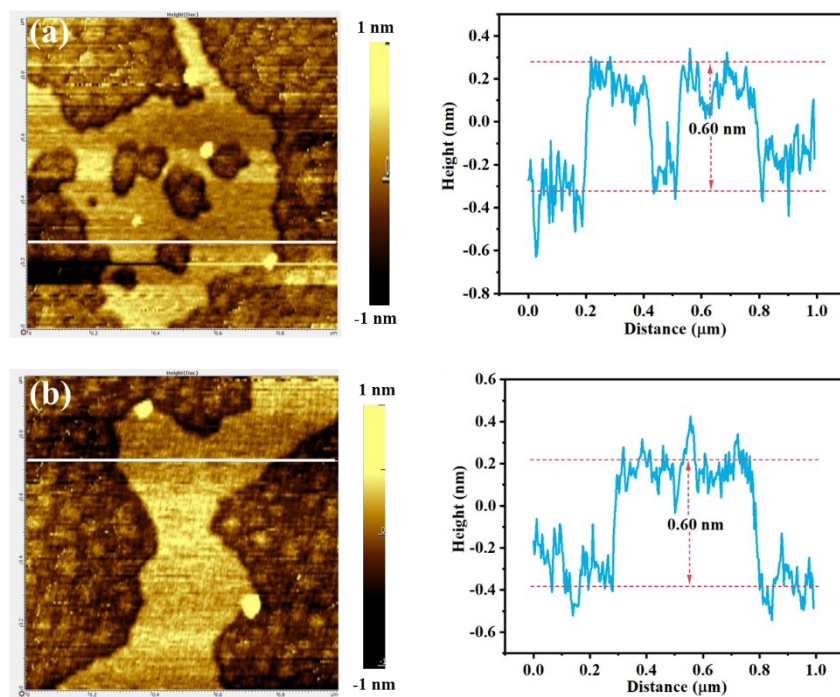

Fig. S4. AFM images and the height distribution profiles of gCN sheet (a-b).

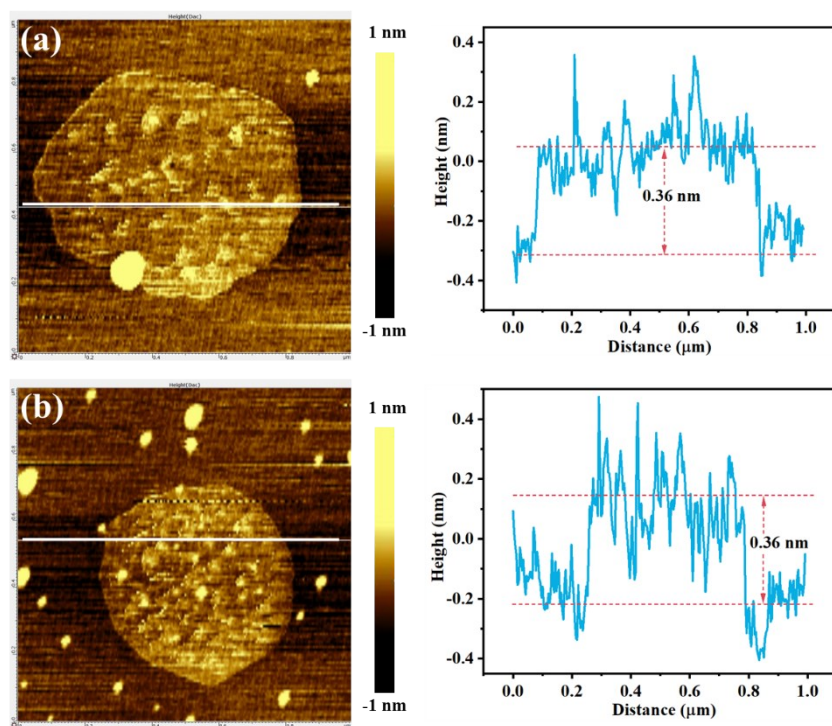

Fig. S5. AFM images and the height distribution profiles of gCN-P (a-b).

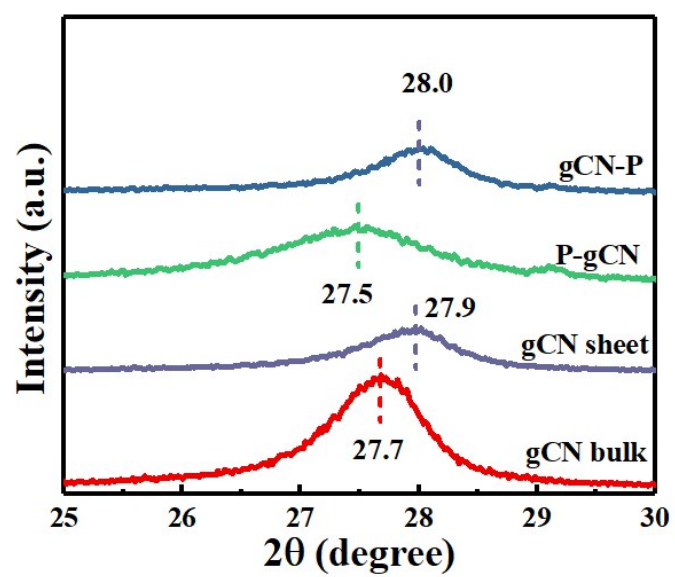

**Fig. S6.** The enlarged view of the (002) peak in the XRD patterns of the prepared samples.

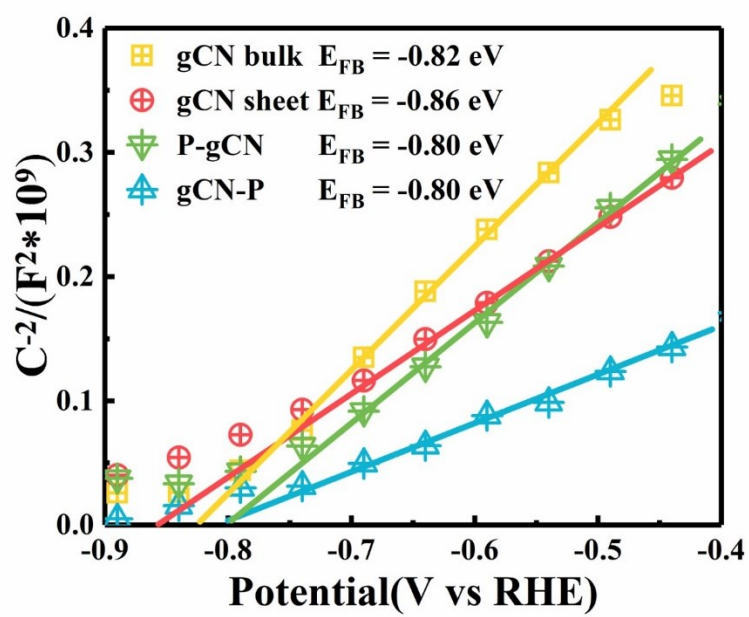

**Fig. S7.** Mott–Schottky plots of gCN bulk, gCN sheet, P-gCN, and gCN-P (post).

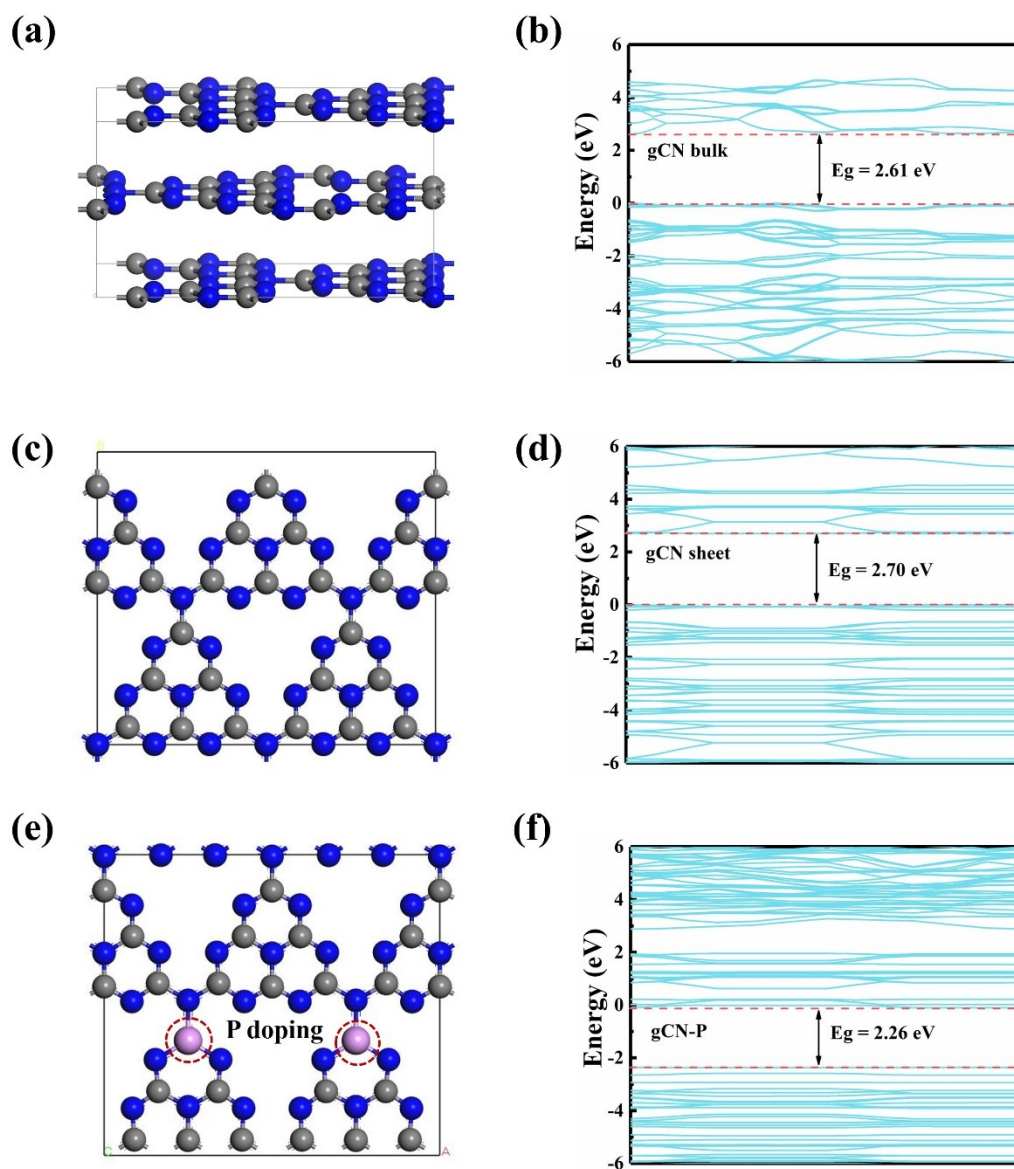

**Fig. S8.** Optimized geometric structure of (a) gCN bulk, (c) gCN sheet and (e) gCN-P (post). Band structure of (b) gCN bulk, (d) gCN sheet and (f) gCN-P (post).

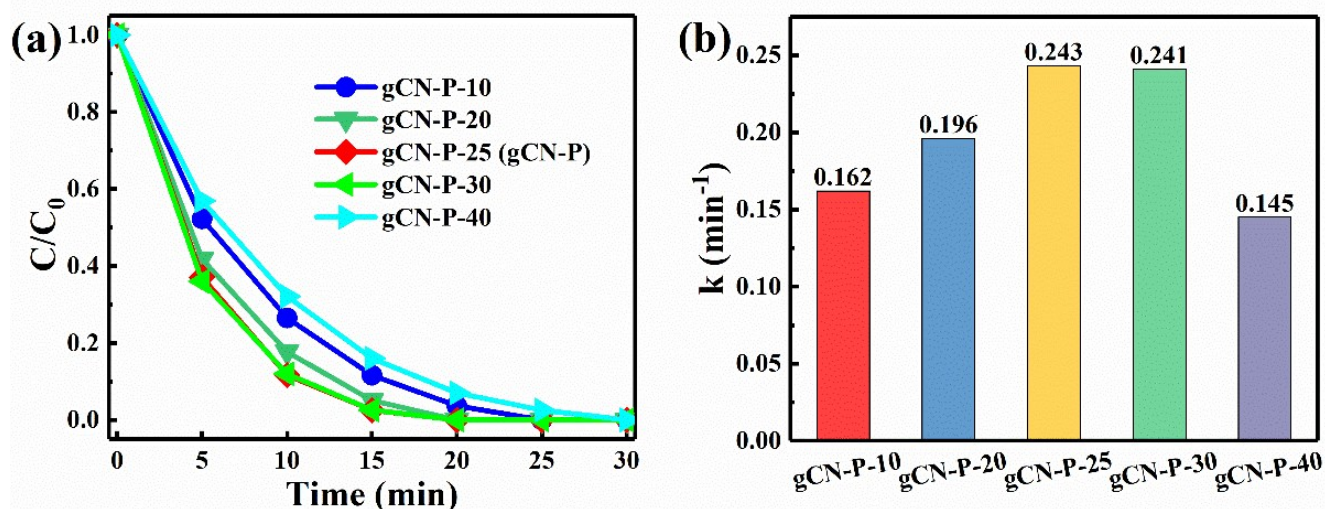

**Fig. S9.** (a) Photocatalytic degradation of BPA by the photocatalysts with different P loadings under visible light irradiation and (b) the relative reaction kinetic data.

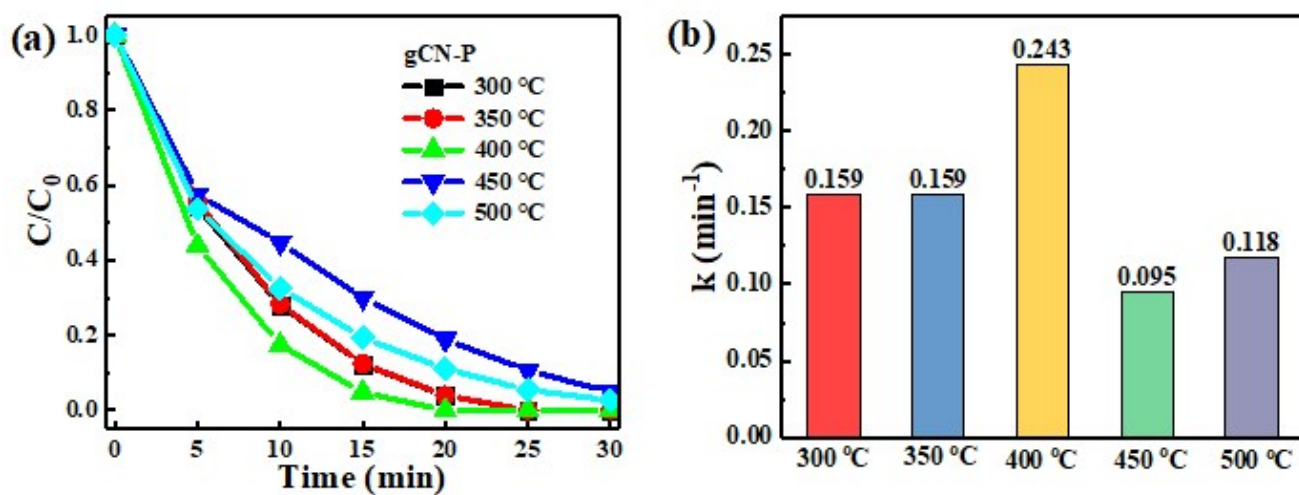

**Fig. S10.** (a) Photocatalytic degradation of BPA by the photocatalysts obtaining from different calcination temperatures under visible light irradiation and (b) the relative reaction kinetic data.

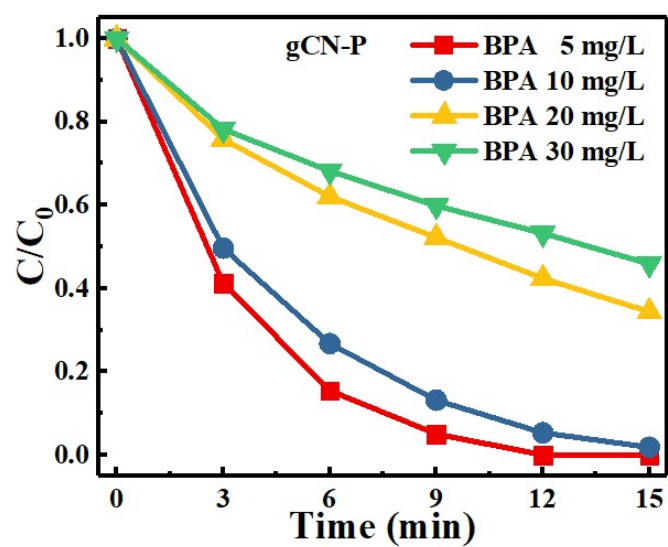

**Fig. S11.** Photocatalytic degradation of BPA with different initial concentrations over the gCN-P (post) under visible light irradiation.

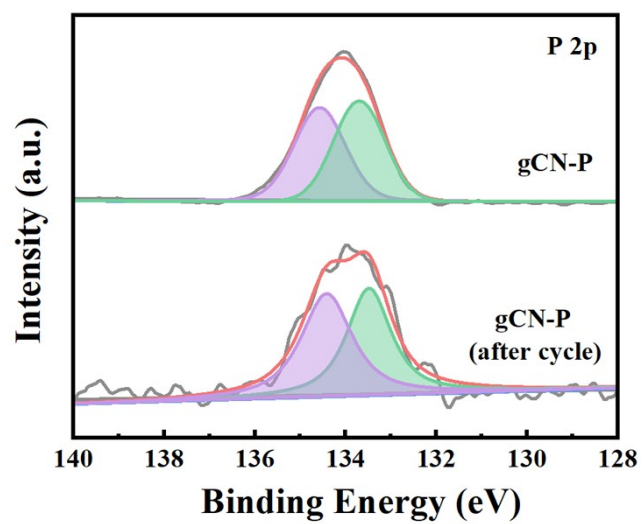

**Fig. S12.** Comparison of P 2p high-resolution XPS spectra of the gCN-P (post) before and after cycling experiments.

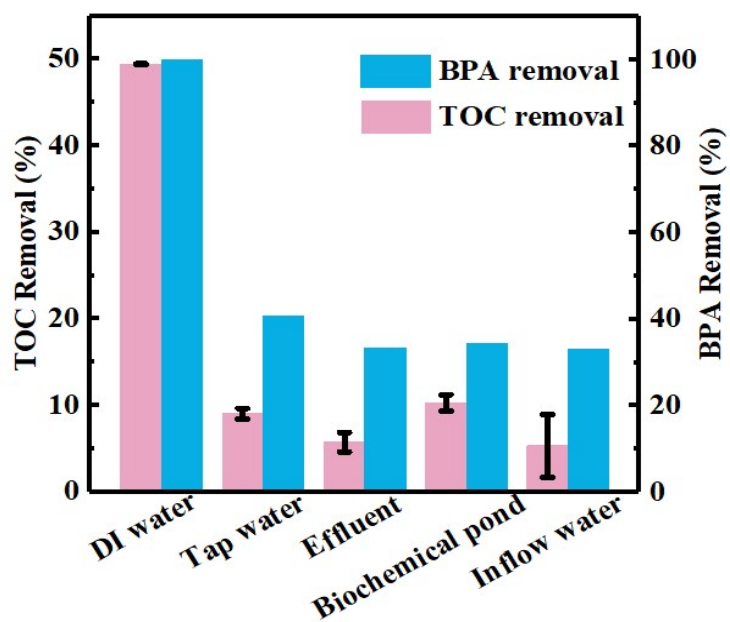

**Fig. S13.** TOC and BPA removals using different water sources by the gCN-P (post) photocatalyst under visible light irradiation with the reaction time of 15 min.

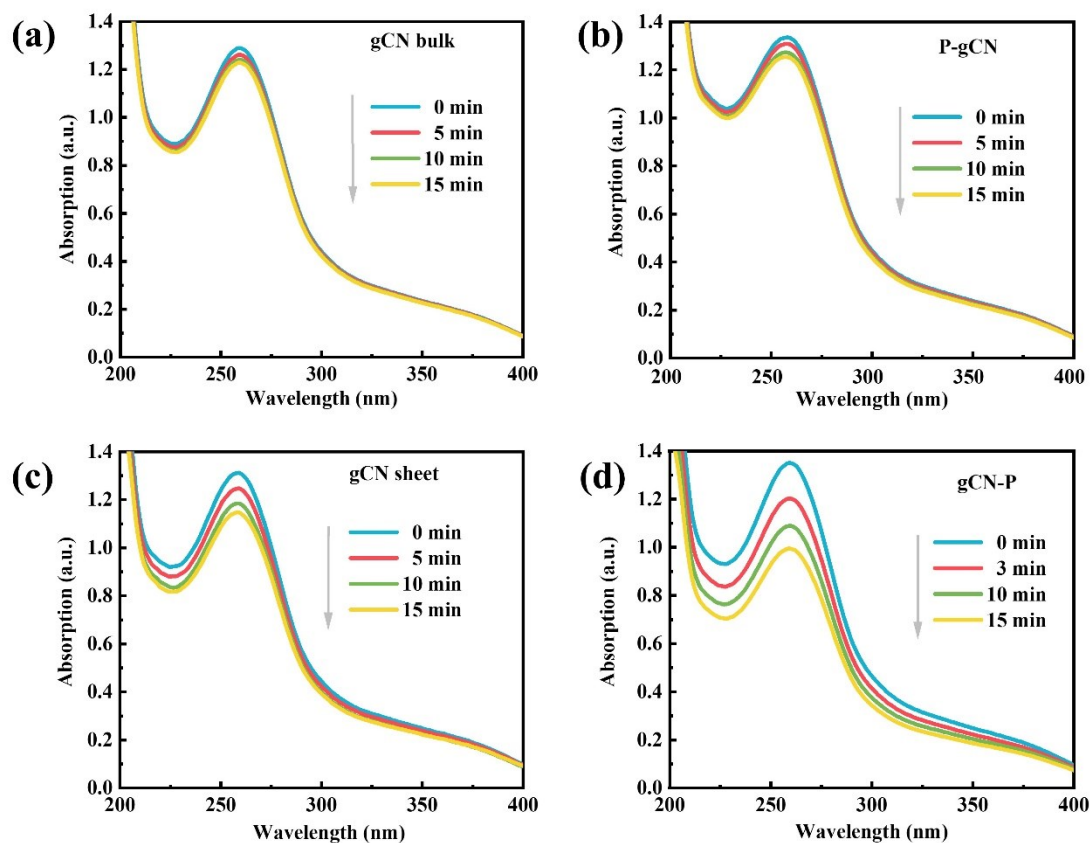

**Fig. S14.** UV absorption variations of NBT at 259 nm in the presence of (a) gCN bulk, (b) P-gCN, (c) gCN sheet and (d) gCN-P.

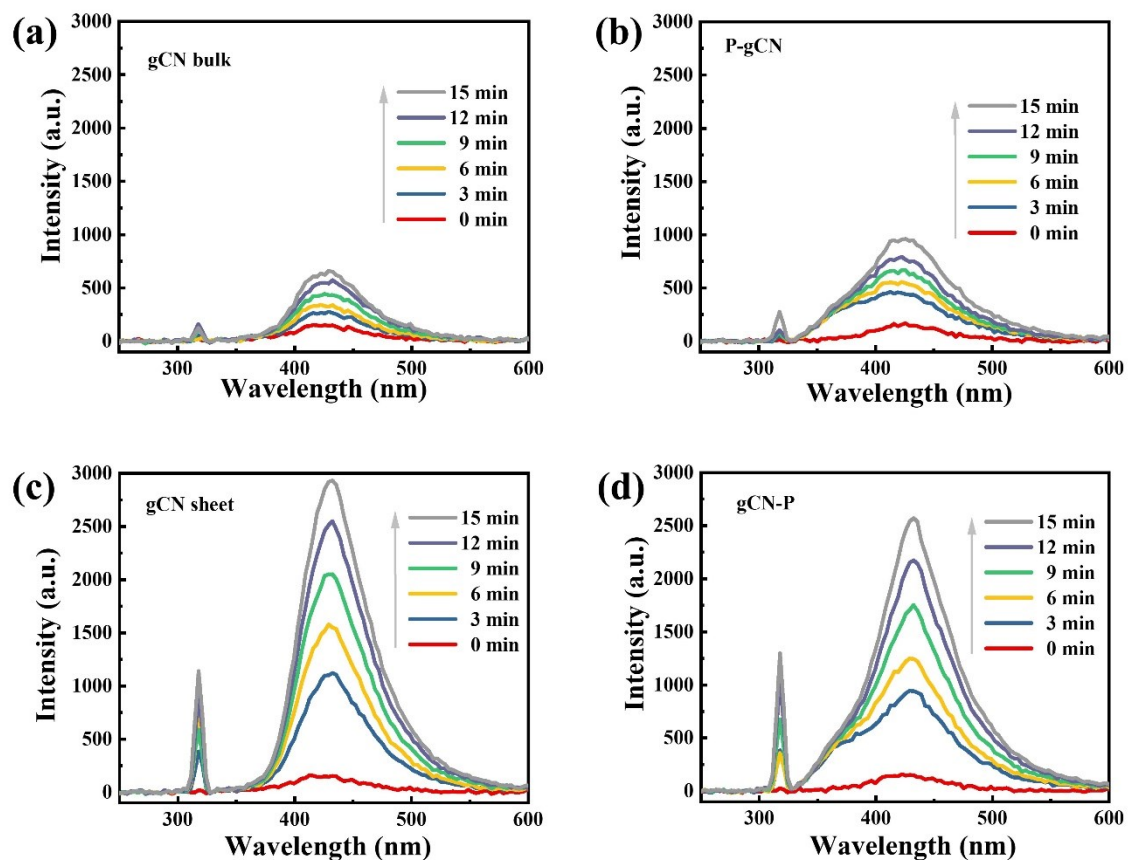

**Fig. S15.** Fluorescent response variations of TAOH in the presence of (a) gCN bulk, (b) P-gCN, (c) gCN sheet and (d) gCN-P.
